# Supplementary material for: Iturin A Rescued STb-R-Induced Pork Skeletal Muscle Growth Restriction through the Hypothalamic-Pituitary-mTORC1 Growth Axis
Source: MDPI journal article supplement (doi:10.3390/ani12121568), 2022-06-17
Supplement: s1 [file s1]

**Table S1.** Ingredient composition and nutritional levels of the diets (air-dry basis, %)

| <b>Ingredients</b>     | <b>Content</b> | <b>Nutritional levels</b>  | <b>Content</b> |
|------------------------|----------------|----------------------------|----------------|
| Corn                   | 33.66          | Digestible energy, MJ/kg   | 14.23          |
| Soybean meal           | 24.00          | Crude protein <sup>2</sup> | 19.15          |
| Extruded corn          | 20.00          | Lysine                     | 1.30           |
| Flour                  | 10.00          | Methionine + cystine       | 0.58           |
| Fermented soybean meal | 4.00           | Threonine                  | 0.71           |
| Soybean oil            | 2.00           | Tryptophan                 | 0.23           |
| Dicalcium phosphate    | 0.80           | Calcium                    | 0.53           |
| Limestone power        | 0.72           | Phosphorus                 | 0.47           |
| Mildew preventive      | 0.05           |                            |                |
| Sodium chloride        | 0.40           |                            |                |
| L-Lysine hydrochloride | 0.37           |                            |                |
| Premix <sup>1</sup>    | 4.00           |                            |                |
| Total                  | 100.00         |                            |                |

<sup>1</sup> The premix provided the following nutrients per kilogram of diet: Fe 101.00 mg; Cu 15.00 mg; Mn 42.00 mg; Zn 102.00 mg; I 0.60 mg; Se 0.30 mg; VA 10500.00 IU; VD<sub>3</sub> 2100.00 IU; VK<sub>3</sub> 3.50 mg; VB<sub>1</sub> 2.24 mg; VB<sub>2</sub> 9.80 mg; VB<sub>6</sub> 2.80 mg; VB<sub>12</sub> 0.05 mg; Folic acid 1.04 mg; Niacin 35.00 mg.

<sup>2</sup> Crude protein was analyzed. Other values were calculated.

**Table S2: Primers used for qRT-PCR**

| Gene                            | Primer    | Sequence (5'- 3')       | Size (bp) |
|---------------------------------|-----------|-------------------------|-----------|
| GHRH (XM_005672915.3)           | sense     | CTGCTCTGGGTGTTCTTCCT    | 262       |
|                                 | antisense | CCATCTGCTTTTGGTCTGC     |           |
| GH (NM_213869.1)                | sense     | GTTTGGCACCTCAGACCG      | 279       |
|                                 | antisense | CCCAGCAACTAGAAGGCACAGC  |           |
| GHRHR<br>(XM_021078507.1)       | sense     | CCCCTGCCCCGGCTTTCTTCT   | 558       |
|                                 | antisense | CCCACCCACGTGCCAGTGAA    |           |
| GHR (XM_021076575.1)            | sense     | TGAGCCCATTTCATGTGAAG    | 322       |
|                                 | antisense | TCTGAGCCTTCAGTCTTTTCATC |           |
| IGF-1 (XM_005664199.3)          | sense     | GGACCCGAGACCCTCTGCGGG   | 210       |
|                                 | antisense | GGCCGACTTGGCGGGCTTG     |           |
| IGF-1R (XM_021082920.1)         | sense     | TACGTCCAGGCCAAAACGA     | 287       |
|                                 | antisense | GCGACGCCTTCATAAACCA     |           |
| GAPDH<br>(NM_001206359.1)       | sense     | GGTCGGAGTGAACGGATTT     | 246       |
|                                 | antisense | CATTTGATGTTGGCGGGAT     |           |
| $\beta$ -actin (XM_003124280.5) | sense     | CTGGAACGGTGAAGGTGACA    | 165       |
|                                 | antisense | AAGGGACTTCCTGTAACAATGCA |           |

*GHRH* = growth-hormone-releasing hormone; *GH* = growth hormone; *GHRHR* = growth-hormone-releasing hormone receptor; *GHR* = growth hormone receptor; *IGF-1* = insulin-like growth factor 1; *IGF-1R* = insulin-like growth factor 1 receptor; *GAPDH* = glyceraldehyde-3-phosphate dehydrogenase.

**Table S3. The effect of Iturin A and STb-R on the porcine hindquarter muscles (g).**

| Item                                | Control    | Iturin A   | STb-R      | Iturin A+STb-R | <i>P</i> -value |
|-------------------------------------|------------|------------|------------|----------------|-----------------|
| <i>Middle gluteus medius</i> muscle | 24.65±1.69 | 27.57±2.12 | 25.70±2.00 | 26.25±1.04     | 0.505           |
| <i>Medial vastus</i> muscle         | 45.95±2.59 | 48.58±2.30 | 44.68±3.63 | 47.97±1.34     | 0.100           |
| <i>Biceps femoris</i> muscle        | 27.2±2.21  | 29.52±1.46 | 23.63±2.91 | 28.57±1.65     | 0.488           |
| <i>Tensor fascia lata</i> muscle    | 23.9±0.72  | 25.44±1.38 | 25.66±1.55 | 27.07±2.35     | 0.182           |
| <i>Cranial tibial</i> muscle        | 71.05±4.26 | 71.85±2.00 | 67.38±2.73 | 75.33±2.33     | 0.305           |
| <i>Peroneus tertius</i> muscle      | 18.95±1.29 | 19.25±0.80 | 19.1±1.01  | 20.96±1.17     | 0.193           |
| <i>Gracilis</i> muscle              | 14.55±0.87 | 16.07±0.51 | 14.35±1.35 | 15.73±0.54     | 0.252           |
| <i>Adductor</i> muscle              | 14.86±0.77 | 15.75±0.35 | 14.4±0.63  | 14.93±0.68     | 0.376           |
| <i>Long peroneal</i> muscle         | 11.85±1.17 | 13.4±1.24  | 10.4±1.10  | 13.1±1.04      | 0.209           |

Data were presented as mean ± SEM (n=7).

**Table S4. The effect of Iturin A and STb-R on the porcine forequarter muscles (g).**

| Item                                             | Control      | Iturin A    | STb-R        | Iturin A +STb-R | <i>P</i> -value |
|--------------------------------------------------|--------------|-------------|--------------|-----------------|-----------------|
| <i>Infraspinatus</i> muscle                      | 85.58±4.30   | 88.05±3.31  | 77.6±7.53    | 87.1±4.42       | 0.302           |
| <i>Cranial portion of infraspinatus</i> muscle   | 145.64±12.83 | 134.94±3.35 | 157.07±13.06 | 164.79±12.62    | 0.127           |
| <i>Supraspinatus</i> muscle                      | 24.3±1.45    | 24.88±2.35  | 24.73±2.48   | 22.03±1.21      | 0.389           |
| <i>Subclavius</i> muscle                         | 4.08±0.31    | 4.04±0.15   | 3.82±0.57    | 4.21±0.26       | 0.709           |
| <i>Long head of triceps of brachii</i> muscle    | 8.96±0.92    | 9.6±0.34    | 9.31±0.27    | 9.99±0.48       | 0.278           |
| <i>Lateral head of triceps of brachii</i> muscle | 30.17±0.94   | 28.68±1.33  | 28.75±1.33   | 28.75±1.77      | 0.251           |
| <i>Extensor carp iradialis</i> muscle            | 4.36±0.57    | 4.27±0.15   | 4.16±0.39    | 4.95±0.14       | 0.264           |
| <i>Latissimus dorsi</i> muscle                   | 94.4±7.09    | 98.7±6.41   | 96.78±3.47   | 90.53±4.50      | 0.614           |

Data were presented as mean ± SEM (n=7).
